# Supplementary material for: Measuring the Phytochemical Richness of Meat: Effects of Grass/Grain Finishing Systems and Grapeseed Extract Supplementation on the Fatty Acid and Phytochemical Content of Beef
Source: MDPI journal article supplement (doi:10.3390/foods12193547), 2023-09-24
Supplement: s1 [file s1]

**Supplementary Table S1. Phytochemical profile of feeds (mg per 100 g).**

|                                  | <b>GRAIN<sup>1</sup></b> | <b>GRAPE<sup>2</sup></b> | <b><i>p</i>-Value</b> |
|----------------------------------|--------------------------|--------------------------|-----------------------|
| <b>Isocitric acid lactone</b>    | 6.44 ± 1.09              | 6.80 ± 1.48              | 0.850                 |
| <b>Sucrose</b>                   | 32.07 ± 3.19             | 32.26 ± 5.91             | 0.978                 |
| <b>D-Maltose</b>                 | 38.50 ± 3.90             | 37.58 ± 6.29             | 0.906                 |
| <b>Citric acid</b>               | 2.45 ± 0.31              | 2.01 ± 0.70              | 0.594                 |
| <b>D-Tartaric acid</b>           | 1.25 ± 0.07              | 1.17 ± 0.16              | 0.653                 |
| <b>Succinic acid</b>             | 3.86 ± 0.42              | 3.74 ± 0.43              | 0.848                 |
| <b>Adipic acid</b>               | 2.13 ± 0.54              | 2.30 ± 0.76              | 0.862                 |
| <b>(-)-Epicatechin gallate</b>   | 26.67 ± 25.00            | 188.13 ± 124.82          | 0.288                 |
| <b>Epicatechin</b>               | 2.43 ± 2.35              | 13.19 ± 7.57             | 0.254                 |
| <b>Naringenin</b>                | 0.10 ± 0.01              | 0.11 ± 0.02              | 0.688                 |
| <b>Hesperidin</b>                | 0.54 ± 0.09              | 0.43 ± 0.12              | 0.480                 |
| <b>Hesperetin</b>                | 0.14 ± 0.00              | 0.14 ± 0.01              | 0.674                 |
| <b>Apigenin</b>                  | 0.23 ± 0.03              | 0.18 ± 0.06              | 0.514                 |
| <b>Catechol</b>                  | 1.57 ± 0.08              | 1.57 ± 0.10              | 0.986                 |
| <b>Chrysin</b>                   | 0.04 ± 0.00              | 0.05 ± 0.00              | 0.400                 |
| <b>Diosmetin</b>                 | 0.60 ± 0.04              | 0.57 ± 0.02              | 0.424                 |
| <b>Isorhamnetin 3-rutinoside</b> | 17.37 ± 3.18             | 12.49 ± 2.28             | 0.235                 |
| <b>Eriodictyol-7-o-glucoside</b> | 0.11 ± 0.03              | 0.13 ± 0.06              | 0.832                 |
| <b>Isorhamnetin</b>              | 2.25 ± 0.50              | 1.71 ± 0.15              | 0.325                 |
| <b>Biochanin A</b>               | 0.01 ± 0.00              | 0.00 ± 0.00              | 0.945                 |
| <b>Kaempferol</b>                | 0.30 ± 0.05              | 0.51 ± 0.25              | 0.464                 |
| <b>Pyrogallol</b>                | 0.06 ± 0.01              | 0.05 ± 0.01              | 0.727                 |
| <b>3,4-Dihydroxybenzoic acid</b> | 5.31 ± 0.39              | 5.43 ± 0.65              | 0.884                 |
| <b>Salicylic acid</b>            | 3.47 ± 0.13              | 3.16 ± 0.29              | 0.371                 |
| <b>Vanillic acid</b>             | 7.22 ± 0.28              | 6.34 ± 0.31              | 0.065                 |
| <b>2,6-Dihydroxybenzoic acid</b> | 10.10 ± 0.97             | 12.57 ± 1.14             | 0.139                 |

|                                  |              |              |         |
|----------------------------------|--------------|--------------|---------|
| <b>Quercetin</b>                 | 4.20 ± 0.35  | 6.95 ± 2.54  | 0.359   |
| <b>Caffeic acid</b>              | 0.20 ± 0.02  | 0.16 ± 0.01  | 0.162   |
| <b>Ellagic acid</b>              | 0.07 ± 0.07  | 1.92 ± 1.62  | 0.338   |
| <b>Pyrocatechol sulfate</b>      | 3.34 ± 0.22  | 3.35 ± 0.57  | 0.990   |
| <b>Syringic acid</b>             | 2.23 ± 0.10  | 2.18 ± 0.25  | 0.849   |
| <b>Ethyl gallate</b>             | 0.01 ± 0.01  | 0.09 ± 0.04  | 0.265   |
| <b>Chlorogenic acid</b>          | 48.52 ± 7.34 | 35.96 ± 3.67 | 0.150   |
| <b>Coixol</b>                    | 0.43 ± 0.11  | 0.28 ± 0.03  | 0.225   |
| <b>3,5-Dihydroxybenzoic acid</b> | 5.21 ± 0.31  | 5.75 ± 0.31  | 0.248   |
| <b>Vanillin</b>                  | 5.58 ± 0.55  | 6.74 ± 0.47  | 0.136   |
| <b>4-Hydroxybenzoic acid</b>     | 6.81 ± 0.63  | 6.67 ± 0.94  | 0.913   |
| <b>Gallocatechin gallate</b>     | 1.67 ± 0.38  | 4.42 ± 2.11  | 0.285   |
| <b>Arbutin</b>                   | 0.53 ± 0.04  | 0.50 ± 0.06  | 0.698   |
| <b>p-Coumaric acid</b>           | 8.70 ± 0.30  | 8.01 ± 0.30  | 0.132   |
| <b>Shikimic acid</b>             | 1.70 ± 0.13  | 1.59 ± 0.36  | 0.801   |
| <b>Thiamine</b>                  | 0.07 ± 0.00  | 0.07 ± 0.00  | 0.816   |
| <b>Niacin</b>                    | 0.06 ± 0.01  | 0.01 ± 0.00  | < 0.010 |
| <b>Nicotinic acid</b>            | 0.11 ± 0.00  | 0.14 ± 0.03  | 0.428   |
| <b>Pyridoxine</b>                | 0.01 ± 0.00  | 0.01 ± 0.00  | 0.490   |
| <b>Riboflavin</b>                | 1.41 ± 0.15  | 0.99 ± 0.13  | 0.062   |
| <b>Alpha-tocopherol</b>          | 1.29 ± 0.14  | 1.19 ± 0.26  | 0.756   |
| <b>Pantothenic acid</b>          | 0.16 ± 0.01  | 0.14 ± 0.00  | 0.096   |
| <b>Stachydrine</b>               | 1.03 ± 0.10  | 1.05 ± 0.10  | 0.848   |
| <b>Trigonelline</b>              | 0.11 ± 0.01  | 0.11 ± 0.01  | 0.686   |
| <b>Tyramine</b>                  | 0.00 ± 0.00  | 0.06 ± 0.06  | 0.420   |
| <b>Betaine</b>                   | 0.58 ± 0.03  | 0.44 ± 0.04  | < 0.050 |
| <b>Tricine</b>                   | 0.31 ± 0.06  | 0.27 ± 0.09  | 0.701   |
| <b>Tamarixetin</b>               | 1.74 ± 0.28  | 1.27 ± 0.20  | 0.203   |

|                                 |              |              |       |
|---------------------------------|--------------|--------------|-------|
| <b>Sophoricoside</b>            | 6.54 ± 1.86  | 6.57 ± 3.10  | 0.995 |
| <b>Quercetin-3-O-lactoside</b>  | 2.74 ± 0.27  | 5.03 ± 1.96  | 0.327 |
| <b>Scopoletin</b>               | 0.02 ± 0.00  | 0.02 ± 0.00  | 0.835 |
| <b>Calycosin</b>                | 0.07 ± 0.03  | 0.07 ± 0.05  | 0.981 |
| <b>Glycitein</b>                | 0.35 ± 0.11  | 0.29 ± 0.13  | 0.762 |
| <b>Naringenin-7-O-glucoside</b> | 37.38 ± 7.68 | 31.60 ± 2.46 | 0.488 |
| <b>Xanthohumol</b>              | 0.06 ± 0.02  | 0.03 ± 0.00  | 0.195 |
| <b>Schaftoside</b>              | 2.89 ± 0.32  | 2.10 ± 0.46  | 0.209 |
| <b>Chrysoeriol</b>              | 2.56 ± 0.22  | 2.33 ± 0.12  | 0.363 |
| <b>Isovitexin/Nitexin</b>       | 6.60 ± 0.52  | 5.53 ± 1.15  | 0.438 |
| <b>Jasmonic acid</b>            | 0.70 ± 0.09  | 0.51 ± 0.14  | 0.299 |
| <b>Morin</b>                    | 0.91 ± 0.04  | 0.89 ± 0.10  | 0.836 |

---

Values reported as means ± standard error. Results of two-sample t-test. Statistical significance at  $p < 0.05$ . <sup>1</sup>GRAIN: total mixed ration (TMR) ( $n = 11$ ); <sup>2</sup>GRAPE: TMR + 5% DM grapeseed extracts ( $n = 4$ ). N.B.: no GRASS (diverse pasture) samples were left for the phytochemical analysis.
